# Supplementary material for: Blockade of the vaspin–AP-1 axis inhibits arthritis development
Source: Springer Nature journal article supplement (doi:10.1038/s12276-025-01418-z), 2025-03-03
Supplement: MOESM1 [file 12276_2025_1418_MOESM1_ESM.pdf]

**Supplementary Table 1.**

Characteristics of patients with OA from whom specimens were obtained

| No | Age<br>(years)<br>/gender | ICRS<br>grade | Joint | Height<br>(m) | Weight<br>(Kg) | BMI<br>(kg/m <sup>2</sup> ) | Use |
|----|---------------------------|---------------|-------|---------------|----------------|-----------------------------|-----|
| 1  | 65/F                      | 4             | Knee  | 158           | 53             | 21.33                       | IHC |
| 2  | 80/F                      | 4             | Knee  | 143.3         | 55.1           | 26.83                       | IHC |
| 3  | 72/F                      | 4             | Knee  | 165           | 65             | 23.88                       | IHC |
| 4  | 63/F                      | 4             | Knee  | 152           | 52             | 22.51                       | IHC |
| 5  | 69/F                      | 4             | Knee  | 151           | 60             | 26.31                       | IHC |
| 6  | 73/F                      | 4             | Knee  | 153           | 70.75          | 29.89                       | IHC |
| 7  | 63/F                      | 4             | Knee  | 156           | 72.2           | 29.67                       | IHC |
| 8  | 73/F                      | 4             | Knee  | 154           | 83             | 35                          | IHC |

**Supplementary Table 2.** Primer sequence and PCR conditions

| Gene          | Origin | Strand                            | Sequence                                                  | Size<br>(bp) | AT <sup>a</sup><br>(°C) |
|---------------|--------|-----------------------------------|-----------------------------------------------------------|--------------|-------------------------|
| <i>Vaspin</i> | Mouse  | <sup>b</sup> S<br><sup>c</sup> As | 5'-TTGCTCGACACAACATGGAAT-3'<br>5'-CACCATGTCCGCATCATAAC-3' | 347          | 60                      |
| <i>c-Jun</i>  | Mouse  | S<br>As                           | 5'- TGTGCCCCAAGAACGTGAC-3'<br>5'-CCGGGTGAAGTTGCTGAG-3'    | 243          | 62                      |
| <i>c-Fos</i>  | Mouse  | S<br>As                           | 5'-CGGGTTTCAACGCCGACTA-3'<br>5'-TTGGCACTAGAGACGGACAGA-3'  | 166          | 62                      |
| <i>Fosl1</i>  | Mouse  | S<br>As                           | 5'-ATGTACCGAGACTACGGGGAA-3'<br>5'-CTGCTGCTGTCGATGCTTG-3'  | 140          | 62                      |
| <i>Fosl2</i>  | Mouse  | S<br>As                           | 5'-CCAGCAGAAGTTCCGGGTAG-3'<br>5'-GTAGGGATGTGAGCGTGGATA-3' | 151          | 61                      |
| <i>FosB</i>   | Mouse  | S<br>As                           | 5'-TTTTCCCGGAGACTACGACTC-3'<br>5'-GTGATTGCGGTGACCGTTG-3'  | 174          | 62                      |
| <i>JunB</i>   | Mouse  | S<br>As                           | 5'-TCACGACGACTCTTACGCAG-3'<br>5'-CCTTGAGACCCCGATAGGGA-3'  | 125          | 62                      |
| <i>JunD</i>   | Mouse  | S<br>As                           | 5'-GAAACGCCCTTCTATGGCGA-3'<br>5'-CAGCGCGTCTTCTTCAGC-3'    | 162          | 62                      |
| <i>Gapdh</i>  | Mouse  | S<br>As                           | 5'-TCACTGCCACCCAGAAGAC-3'<br>5'-TGTAGGCCATGAGGTCCAC-3'    | 450          | 62                      |

<sup>a</sup>AT, annealing tem

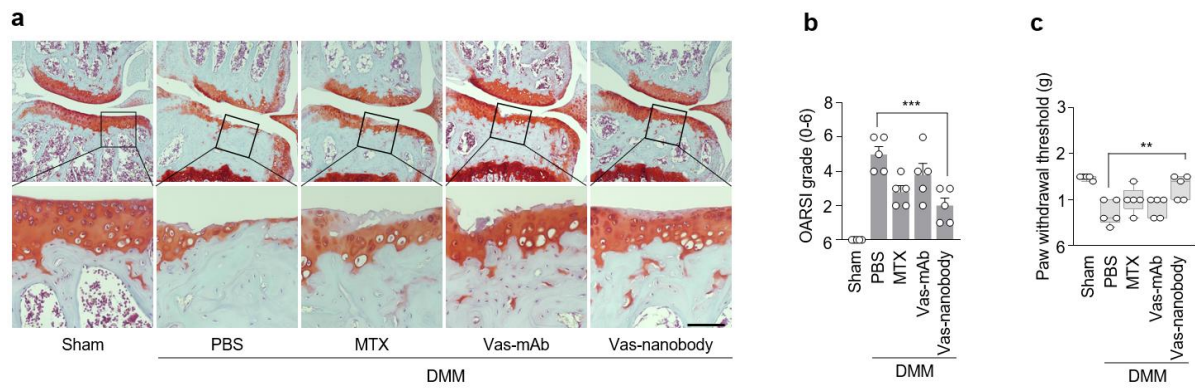

**Supplementary Fig. 1 Expression level of Vaspin in metabolic OA pathogenesis.** (a) Safranin-O staining and Vaspin immunostaining images (left) and OARSI grading (right) of cartilage from mice fed normal diet (ND) or high-fat diet (HFD) and induced by DMM surgery. (b) Densitometric analysis of Vaspin protein expression levels in cartilage. (c) Mechanical allodynia, as measured by the von Frey test. Values are presented as the mean  $\pm$  SEM (n = 5) and were assessed using Mann-Whitney *U* test (a, b). \*\* $p < 0.01$ . Scale bar: 100  $\mu$ m.

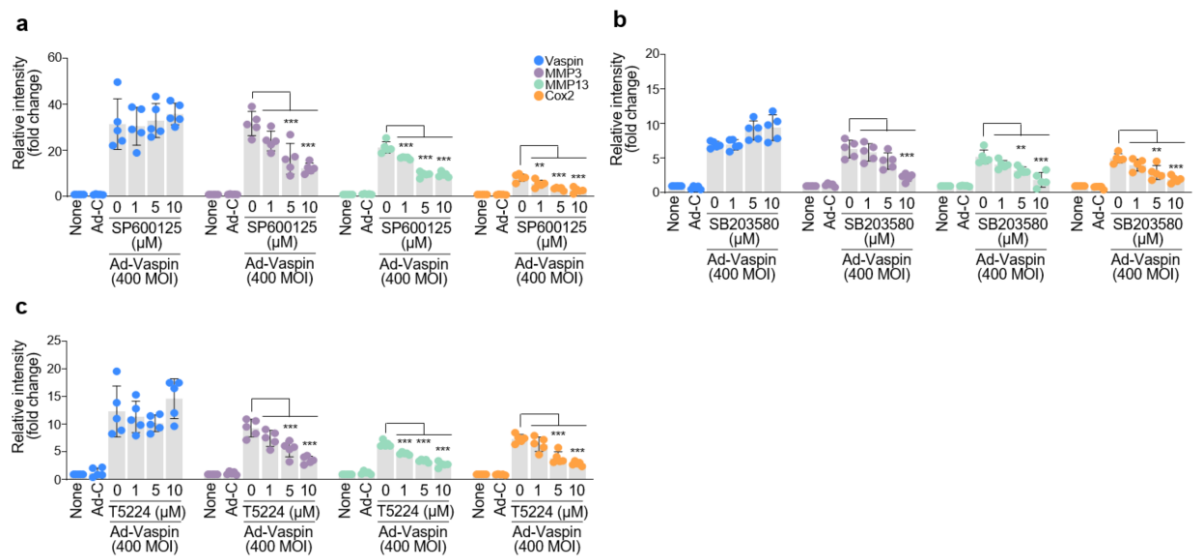

**Supplementary Fig. 2 Densitometric analysis of Vaspin, Mmp3, Mmp13, and Cox-2 expression levels in Vaspin-overexpressed chondrocytes treated with inhibitors of JNK (SP600125) (a), p38 MAPK (SB203580) (b), and AP-1 (T5224) (c). Values are presented as means  $\pm$  SEM and were assessed using one-way ANOVA with Tukey's multiple comparisons test (a-c). \*\* $p < 0.01$ ; \*\*\* $p < 0.001$ .**

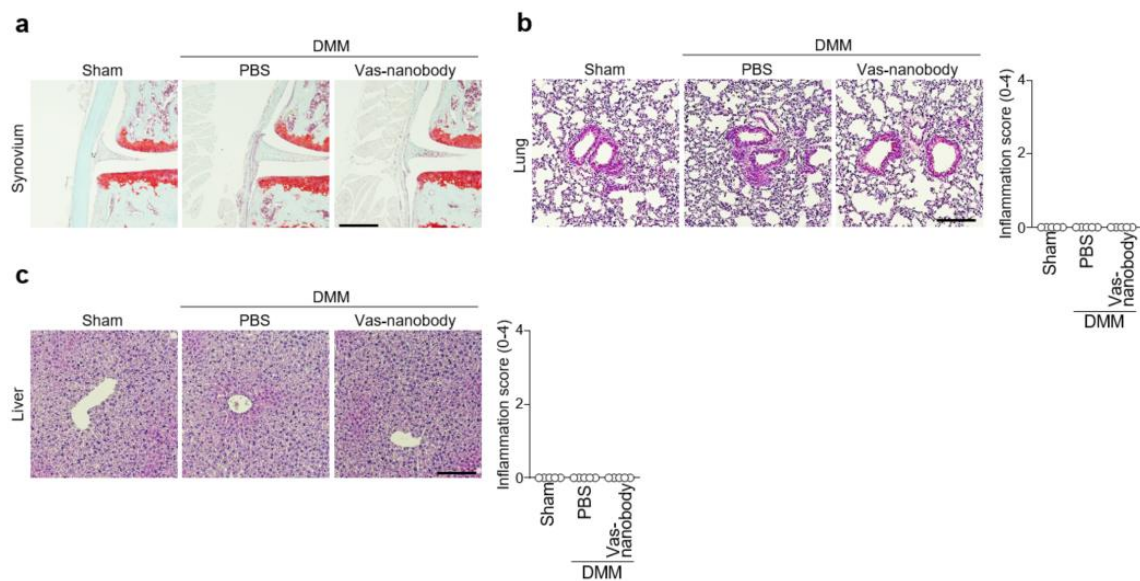

**Supplementary Fig. 3 Cytotoxicity assays for Vas-nanobody in synovial membrane, lung, and liver samples obtained from mice given intra-articular injection of PBS or Vas-nanobody (25  $\mu$ g in a total volume of 10  $\mu$ l). (a-c) Shown are representative images (left) and scoring of inflammation (right) in synovial membrane (a), lung tissue (b), and liver tissue (c). Values are presented as the mean  $\pm$  SEM ( $n = 5$ ) and were assessed using the Mann-Whitney  $U$  test (b and c; right). Scale bar: 100  $\mu$ m; ns, not significant.**

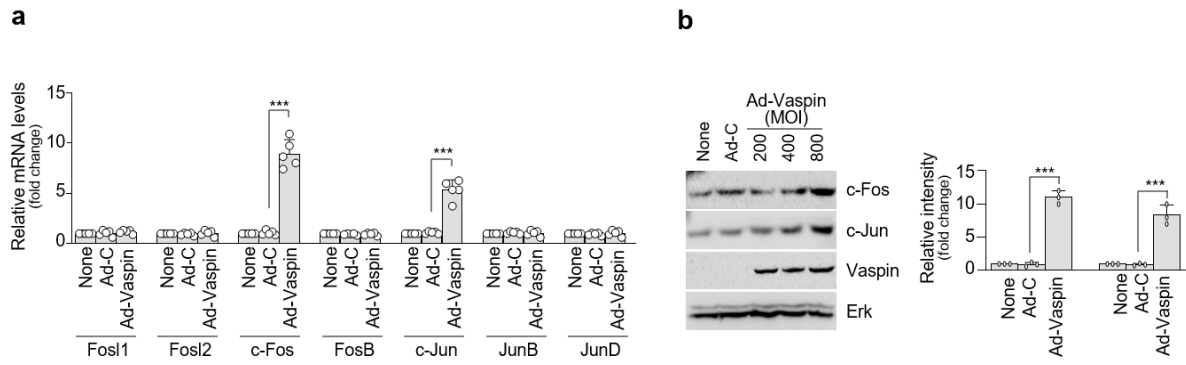

**Supplementary Fig. 4 Among AP-1 complexes, Vaspin regulates the expression of catabolic factors in OA by modulating c-Fos, and c-Jun.** (a) Relative mRNA levels of AP-1 complex components (Fos11, Fos12, c-Fos, FosB, C-Jun, JunB, and JunD) were determined by qRT-PCR analysis in Ad-Vaspin (800 MOI)- and Ad-C-infected chondrocytes (n = 5). (b) Ad-Vaspin infection dose-dependently increases the protein expression levels of c-Fos and c-Jun manner (left). Densitometry analysis of each target protein in Ad-Vaspin (800 MOI)- and Ad-C infected chondrocytes (n=3). Values are expressed as mean  $\pm$  SD and were assessed using one-way ANOVA with Bonferroni's post-hoc test (a, b). \*\*\*p < 0.001.

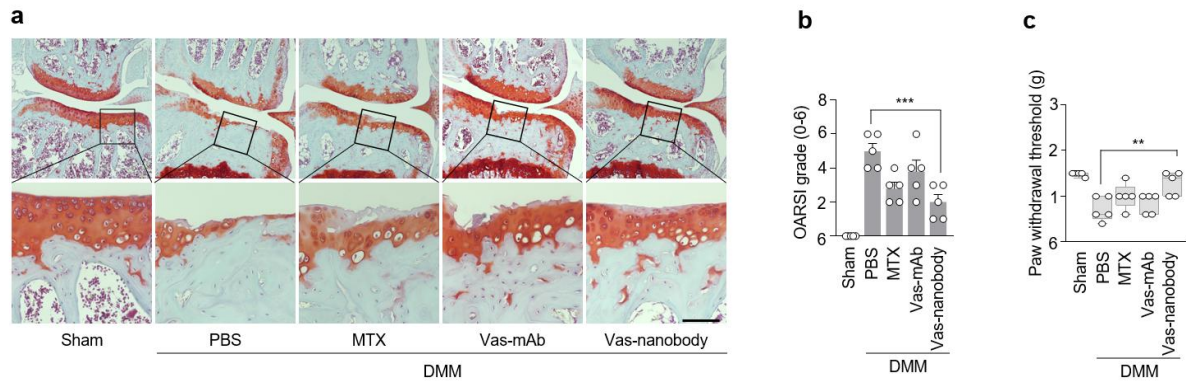

**Supplementary Fig. 5 IA injection of Vas-nanobody has stronger effects than MTX or Vas-mAb in inhibiting cartilage breakdown and decreasing mechanical allodynia.** (a, b) Safranin-O staining (a) and OARSI grading (b) of cartilage from DMM-induced OA mice given IA injection of methotrexate (MTX), Vaspin monoclonal antibody (Vas-monoclonal Ab), or Vaspin-nanobody (Vas-nanobody). (c) Mechanical allodynia, as measured by Von Frey test ( $n = 5$ ). Values are presented as the mean  $\pm$  SEM ( $n = 5$ ) and were assessed using Mann-Whitney  $U$  test (a, b). \*\* $p < 0.01$ , \*\*\* $p < 0.001$ . Scale bar: 100  $\mu$ m.
